# Supplementary material for: The Use of Complementary and Alternative Medicine among Peritoneal Dialysis Patients at a Second-Level Hospital in Yucatán Mexico
Source: MDPI journal article supplement (doi:10.3390/healthcare11050722), 2023-03-01
Supplement: s1 [file s1]

**ANEXO 1**  
**USANZA DE MEDICINA ALTERNATIVA Y COMPLEMENTARIA POR PACIENTES CON ENFERMEDAD RENAL CRÓNICA TERMINAL EN TRATAMIENTO CON DIÁLISIS PERITONEAL ATENDIDOS EN EL**  
**HOSPITAL GENERAL REGIONAL No.1 DEL INSTITUTO MEXICANO DEL SEGURO SOCIAL, DELEGACIÓN YUCATÁN**  
*ENCUESTA DE PACIENTES DEL SERVICIO DE DIÁLISIS PERITONEAL AMBULATORIA DEL HGR No. 1 IMSS*

Entrevistado Clave: \_\_\_\_\_ Entrevistador: \_\_\_\_\_ Fecha de la entrevista: \_\_\_\_\_

[illegible]

**B. TRATAMIENTOS REALIZADOS POR PROFESIONALES O EXPERTOS.** QUISIERA PREGUNTAR SOBRE TRATAMIENTOS QUE HAYA RECIBIDO DE PARTE DEL PROFESIONAL O EXPERTO.

[illegible]

**C. USO DE MEDICAMENTOS A BASE DE HIERBAS Y SUPLEMENTOS DIETÉTICOS.** ADEMÁS DE LOS MEDICAMENTOS QUE LE PRESCRIBEN LOS MÉDICOS, ALGUNAS PERSONAS UTILIZAN GRAN VARIEDAD DE OTROS PRODUCTOS PARA LA SALUD, COMO POR EJEMPLO MEDICAMENTOS A BASE DE HIERBAS Y SUPLEMENTOS DIETÉTICOS QUE PUEDEN SER COMPRIMIDOS, CÁPSULAS, O LÍQUIDOS (TÉS, TINTURAS, JARABES, INFUSIONES, ETC.)

[illegible]

|                                                                                                                                                                                                                                                      |             |             |                                      |                                                                                       |                                                                                                                          |                           |                             |                                                                                                                                                                              |             |             |                                                                                  |                  |                       |                |             |             |
|------------------------------------------------------------------------------------------------------------------------------------------------------------------------------------------------------------------------------------------------------|-------------|-------------|--------------------------------------|---------------------------------------------------------------------------------------|--------------------------------------------------------------------------------------------------------------------------|---------------------------|-----------------------------|------------------------------------------------------------------------------------------------------------------------------------------------------------------------------|-------------|-------------|----------------------------------------------------------------------------------|------------------|-----------------------|----------------|-------------|-------------|
| Otro<br>Especificar:                                                                                                                                                                                                                                 | <div></div> | <div></div> | <div></div>                          | <div></div>                                                                           | <div></div>                                                                                                              | <div></div>               |                             | <div></div>                                                                                                                                                                  | <div></div> | <div></div> | <div></div>                                                                      | <div></div>      | <div></div>           | <div></div>    | <div></div> | <div></div> |
| D. PRÁCTICAS PERSONALES QUE PROMUEVAN EL BIENESTAR. ADEMÁS DE LOS MEDICAMENTOS QUE PRESCRIBEN LOS MÉDICOS ALGUNAS PERSONAS SUELEN UTILIZAR DIFERENTES TIPOS DE PRÁCTICAS PARA MEJORAR LA SALUD. HA REALIZADO ALGUNA DE ÉSTAS EN LOS ÚLTIMOS 12 MESES |             |             |                                      |                                                                                       |                                                                                                                          |                           |                             |                                                                                                                                                                              |             |             |                                                                                  |                  |                       |                |             |             |
| En los últimos 12 meses ¿ha realizado prácticas personales como?                                                                                                                                                                                     | Si          | No          | No. de veces en los últimos 3 meses? | Cuál fue el motivo principal por el que Ud. realizó la práctica _____ por última vez? |                                                                                                                          |                           |                             |                                                                                                                                                                              |             |             | Cuan beneficioso le resultó la realización de la práctica _____? ¿Diría que....? |                  |                       |                |             |             |
|                                                                                                                                                                                                                                                      |             |             |                                      | Por un problema de salud agudo, es decir, uno que duró menos de un mes                | Un problema de salud crónico, es decir, uno que duró más de un mes, ya sea para tratar el problema en sí, o sus síntomas | Para mejorar su bienestar | Otra, por favor especificar | No corresponde                                                                                                                                                               | No sabe     | No contesta | Muy beneficioso                                                                  | Algo beneficioso | Para nada beneficioso | No corresponde | No sabe     | No contesta |
| 1. Mediatación                                                                                                                                                                                                                                       | <div></div> | <div></div> | <div></div>                          | <div></div>                                                                           | <div></div>                                                                                                              | <div></div>               | <div></div>                 | <div></div>                                                                                                                                                                  | <div></div> | <div></div> | <div></div>                                                                      | <div></div>      | <div></div>           | <div></div>    | <div></div> | <div></div> |
| 2. Yoga                                                                                                                                                                                                                                              | <div></div> | <div></div> | <div></div>                          | <div></div>                                                                           | <div></div>                                                                                                              | <div></div>               | <div></div>                 | <div></div>                                                                                                                                                                  | <div></div> | <div></div> | <div></div>                                                                      | <div></div>      | <div></div>           | <div></div>    | <div></div> | <div></div> |
| 3. Qi Gong (Chi Kung )                                                                                                                                                                                                                               | <div></div> | <div></div> | <div></div>                          | <div></div>                                                                           | <div></div>                                                                                                              | <div></div>               | <div></div>                 | <div></div>                                                                                                                                                                  | <div></div> | <div></div> | <div></div>                                                                      | <div></div>      | <div></div>           | <div></div>    | <div></div> | <div></div> |
| 4. Tai Ji Quan (Tai Chi Chuan)                                                                                                                                                                                                                       | <div></div> | <div></div> | <div></div>                          | <div></div>                                                                           | <div></div>                                                                                                              | <div></div>               | <div></div>                 | <div></div>                                                                                                                                                                  | <div></div> | <div></div> | <div></div>                                                                      | <div></div>      | <div></div>           | <div></div>    | <div></div> | <div></div> |
| 5. Técnicas de relajación                                                                                                                                                                                                                            | <div></div> | <div></div> | <div></div>                          | <div></div>                                                                           | <div></div>                                                                                                              | <div></div>               | <div></div>                 | <div></div>                                                                                                                                                                  | <div></div> | <div></div> | <div></div>                                                                      | <div></div>      | <div></div>           | <div></div>    | <div></div> | <div></div> |
| 6. Visualización                                                                                                                                                                                                                                     | <div></div> | <div></div> | <div></div>                          | <div></div>                                                                           | <div></div>                                                                                                              | <div></div>               | <div></div>                 | <div></div>                                                                                                                                                                  | <div></div> | <div></div> | <div></div>                                                                      | <div></div>      | <div></div>           | <div></div>    | <div></div> | <div></div> |
| Otro<br>Especificar:<br>_____                                                                                                                                                                                                                        | <div></div> | <div></div> | <div></div>                          | <div></div>                                                                           | <div></div>                                                                                                              | <div></div>               | <div></div>                 | <div></div>                                                                                                                                                                  | <div></div> | <div></div> | <div></div>                                                                      | <div></div>      | <div></div>           | <div></div>    | <div></div> | <div></div> |
| OTRA INFORMACION                                                                                                                                                                                                                                     |             |             |                                      |                                                                                       |                                                                                                                          |                           |                             | Efectos adversos al uso de MAC                                                                                                                                               |             |             |                                                                                  |                  |                       |                |             |             |
| Momento de inicio de uso de CAM    (    ) Antes de DP    (    ) Después de DP                                                                                                                                                                        |             |             |                                      |                                                                                       |                                                                                                                          |                           |                             | SI    (    )                      NO (    )                                                                                                                                  |             |             |                                                                                  |                  |                       |                |             |             |
| ¿Ha informado a su médico el uso de medicina alternativa y/o complementaria?<br><br>SI (    )                      NO (    )                                                                                                                         |             |             |                                      |                                                                                       |                                                                                                                          |                           |                             | Tipo de efectos adversos percibidos:<br><br>(    ) Gastrointestinales    (    ) Sistema nervioso    (    ) Dermatológico    (    ) toxicológicos    (    ) en vías urinarias |             |             |                                                                                  |                  |                       |                |             |             |

|                                                                                                                                                                     |                                                                                                                                                                                            |
|---------------------------------------------------------------------------------------------------------------------------------------------------------------------|--------------------------------------------------------------------------------------------------------------------------------------------------------------------------------------------|
| Informa a su médico <input type="checkbox"/> Si <input type="checkbox"/> No                                                                                         | Recomendado por:                                                                                                                                                                           |
| Razones por las que no informa a su médico                                                                                                                          | <input type="checkbox"/> Médico institucional <input type="checkbox"/> Médico particular <input type="checkbox"/> Otros profesionales de la salud <input type="checkbox"/> otros pacientes |
| <input type="checkbox"/> No me pregunta <input type="checkbox"/> No es necesario <input type="checkbox"/> temor a desaprobación <input type="checkbox"/> Otro _____ | <input type="checkbox"/> Familiares <input type="checkbox"/> Amigos <input type="checkbox"/> Publicidad/medios de comunicación <input type="checkbox"/> Otros                              |
